# Supplementary material for: Good clinical outcome for the majority of younger patients with hip fractures: a Swedish nationwide study on 905 patients younger than 50 years of age
Source: PubMed Central journal article supplement (PMC8231413; doi:10.1080/17453674.2021.1876996), 2021-01-22
Supplement: IORT_A_1876996_SM0410.pdf [file IORT_A_1876996_SM0410.pdf]

## Supplementary data

Table 5. Non-response analysis: difference between patients who did and did not respond to the questionnaire 4 months after surgery. Values are count (%) unless otherwise specified

| Factor                       | Without outcome data | With outcome data | p-value |
|------------------------------|----------------------|-------------------|---------|
| Sex                          |                      |                   | < 0.001 |
| Men                          | 413 (66)             | 210 (32)          |         |
| Women                        | 131 (57)             | 100 (43)          |         |
| Age, median (range)          | 41 (15–49)           | 43 (15–49)        |         |
| Age groups                   |                      |                   | 0.007   |
| 15–39                        | 236 (65)             | 124 (35)          |         |
| 40–49                        | 308 (57)             | 237 (43)          |         |
| ASA score                    |                      |                   | 0.09    |
| 1                            | 276 (52)             | 170 (47)          |         |
| 2                            | 175 (33)             | 118 (33)          |         |
| 3                            | 72 (14)              | 63 (17)           |         |
| 4                            | 6 (1)                | 10 (3)            |         |
| Coming from                  |                      |                   | 0.09    |
| Living independently         | 488 (90)             | 313 (87)          |         |
| Group home                   | 13 (2.5)             | 21 (6)            |         |
| Full-service group home      | 9 (2)                | 7 (2)             |         |
| Rehabilitation clinic        | 0                    | 1 (0.5)           |         |
| Emergency hospital           | 25 (4.5)             | 16 (4.5)          |         |
| Other                        | 9 (1)                | 3 (1)             |         |
| Mental status                |                      |                   | 0.4     |
| No cognitive dysfunction     | 363 (96)             | 268 (94)          |         |
| Signs of confusion           | 15 (3.9)             | 14 (5)            |         |
| Diagnosed with dementia      | 1 (0.1)              | 3 (1)             |         |
| Fracture type, n (%)         |                      |                   | 0.4     |
| Cervical                     | 311 (57)             | 217 (60)          |         |
| Trochanteric                 | 140 (26)             | 94 (26)           |         |
| Subtrochanteric              | 93 (17)              | 50 (14)           |         |
| Housing, days median (range) | 4 (1–38)             | 4 (0–77)          |         |
